# Supplementary material
Source: PubMed Central journal article supplement (PMC4829068)
Supplement: NIHMS748394-supplement-supplemental_material.pdf [file NIHMS748394-supplement-supplemental_material.pdf]

**SUPPLEMENTAL MATERIAL**

**Supplemental Table 1. Characteristics of SPS3 Participants by eGFR (in ml/min/1.73m<sup>2</sup>) level at baseline**

| <b>Characteristic</b> | <b>Overall</b> | <b>eGFR &gt;90</b> | <b>eGFR 60-90</b> | <b>eGFR &lt;60</b> |
|-----------------------|----------------|--------------------|-------------------|--------------------|
| N                     | 2610           | 867                | 1331              | 410                |
| Age                   | 63.4 (10.7)    | 58.0 (8.2)         | 65.0 (10.4)       | 69.9 (10.9)        |
| Male Gender           | 1655 (63%)     | 570 (66%)          | 849 (64%)         | 236 (58%)          |
| Race                  |                |                    |                   |                    |
| Non-Hispanic          |                |                    |                   |                    |
| White                 | 1298 (50%)     | 377 (43%)          | 704 (53%)         | 217 (53%)          |
| Black                 | 384 (15%)      | 149 (17%)          | 181 (14%)         | 54 (13%)           |
| Hispanic              | 854 (33%)      | 325 (37%)          | 405 (30%)         | 124 (30%)          |
| Other/mixed           | 75 (3%)        | 17 (2%)            | 43 (3%)           | 15 (4%)            |
| Region                |                |                    |                   |                    |
| North America         | 1674 (64%)     | 546 (63%)          | 872 (65%)         | 256 (62%)          |
| Latin America         | 647 (25%)      | 217 (25%)          | 326 (25%)         | 104 (25%)          |
| Spain                 | 290 (11%)      | 105 (12%)          | 135 (10%)         | 50 (12%)           |
| Smoking               |                |                    |                   |                    |
| Never                 | 1035 (40%)     | 322 (37%)          | 539 (40%)         | 174 (42%)          |
| Current               | 507 (19%)      | 240 (28%)          | 216 (16%)         | 51 (12%)           |
| Past                  | 1069 (41%)     | 306 (35%)          | 578 (43%)         | 185 (45%)          |
| BMI                   | 29.1 (7.0)     | 29.7 (8.7)         | 28.9 (5.9)        | 28.6 (5.8)         |
| Diabetes              | 949 (36%)      | 371 (43%)          | 423 (32%)         | 155 (38%)          |
| Baseline HTN          | 2339 (90%)     | 744 (86%)          | 1207 (91%)        | 388 (95%)          |
| ARB Use               | 428 (16%)      | 102 (12%)          | 242 (18%)         | 84 (20%)           |

|                           |            |           |           |           |
|---------------------------|------------|-----------|-----------|-----------|
| (baseline)                |            |           |           |           |
| ACE Use                   |            |           |           |           |
| (baseline)                | 1375 (53%) | 471 (54%) | 693 (52%) | 211 (51%) |
| CCB (baseline)            | 665 (26%)  | 161 (19%) | 368 (28%) | 136 (33%) |
| BB (baseline)             | 641 (25%)  | 169 (19%) | 332 (25%) | 140 (34%) |
| Diuretic (baseline)       | 951 (36%)  | 271 (31%) | 492 (37%) | 188 (46%) |
| Other (baseline)          | 177 (7%)   | 42 (5%)   | 90 (7%)   | 45 (11%)  |
| ARB (year 1)              | 704 (27%)  | 210 (25%) | 352 (27%) | 142 (35%) |
| ACE (year 1)              | 1201 (47%) | 411 (48%) | 624 (48%) | 166 (41%) |
| CCB (year 1)              | 938 (37%)  | 253 (30%) | 503 (38%) | 182 (45%) |
| BB (year 1)               | 716 (28%)  | 193 (23%) | 381 (29%) | 142 (35%) |
| Diuretic (year 1)         | 1488 (58%) | 458 (54%) | 776 (59%) | 254 (63%) |
| Other (year 1)            | 252 (10%)  | 52 (6%)   | 131 (10%) | 69 (17%)  |
| History of TIA            | 146 (6%)   | 50 (6%)   | 63 (5%)   | 33 (8%)   |
| SBP (mmHg)                |            |           |           |           |
| Baseline                  | 143 (19)   | 140 (17)  | 143 (19)  | 146 (20)  |
| 3 month                   | 133 (16)   | 132 (15)  | 134 (16)  | 136 (17)  |
| 9 month                   | 132 (15)   | 131 (14)  | 132 (15)  | 133 (15)  |
| eGFR                      |            |           |           |           |
| ml/min/1.73m <sup>2</sup> | 80 (18.5)  | 100 (7.7) | 76 (8.4)  | 51 (7.1)  |

---

BMI=body mass index, ACE= angiotensin converting enzyme inhibitor, ARB= angiotensin receptor blocker, CCB= calcium channel blocker, BB= beta blocker, TIA= history of transient ischemic attack, SBP=systolic blood pressure

2 persons are missing creatinine data at baseline, but have at least two values at follow-up (are included in overall)

**Supplemental Table 2. The Association of Selected Characteristics, Achieved SBP and Baseline Use of Anti-Hypertensive Medication Classes with Rapid Kidney Function Decline Among SPS3 Participants (n=2520)**

| Characteristic                    | Adjusted*<br>OR (95%CI) |
|-----------------------------------|-------------------------|
| Age (per 11 years)                | 1.2 (1.0, 1.3)          |
| Achieved SBP<br>(per SD increase) | 1.2 (1.1, 1.3)          |
| ACE or ARB                        | 1.3 (1.0, 1.7)          |
| ACE and ARB                       | 1.1 (0.4, 2.8)          |
| Diuretic                          | 1.1 (0.9, 1.4)          |
| CCB                               | 1.2 (1.0, 1.6)          |
| Beta Blocker                      | 1.6 (1.2, 2.0)          |
| Diabetes                          | 2.1 (1.7, 2.6)          |
| Current Smoking (vs. never)       | 1.4 (1.0, 1.9)          |
| eGFR (ml/min/1.73m <sup>2</sup> ) | 1.1 (0.9, 1.2)          |

\*Adjusted for treatment arm (in overall), age, gender, race/ethnicity, smoking, diabetes, history of TIA, region, BMI, baseline use of ACE, ARB, diuretic, calcium channel blocker, beta blocker (each adjusted for use of the other classes), baseline eGFR. ACE or ARB= use of one (vs. none), ACE and ARB means use of both (vs. none)

**Supplemental Figure 1. The Effect of Usual vs. Intensive BP Lowering and Kidney Function Decline by Age, Diabetes and Chronic Kidney Disease Status at Baseline**

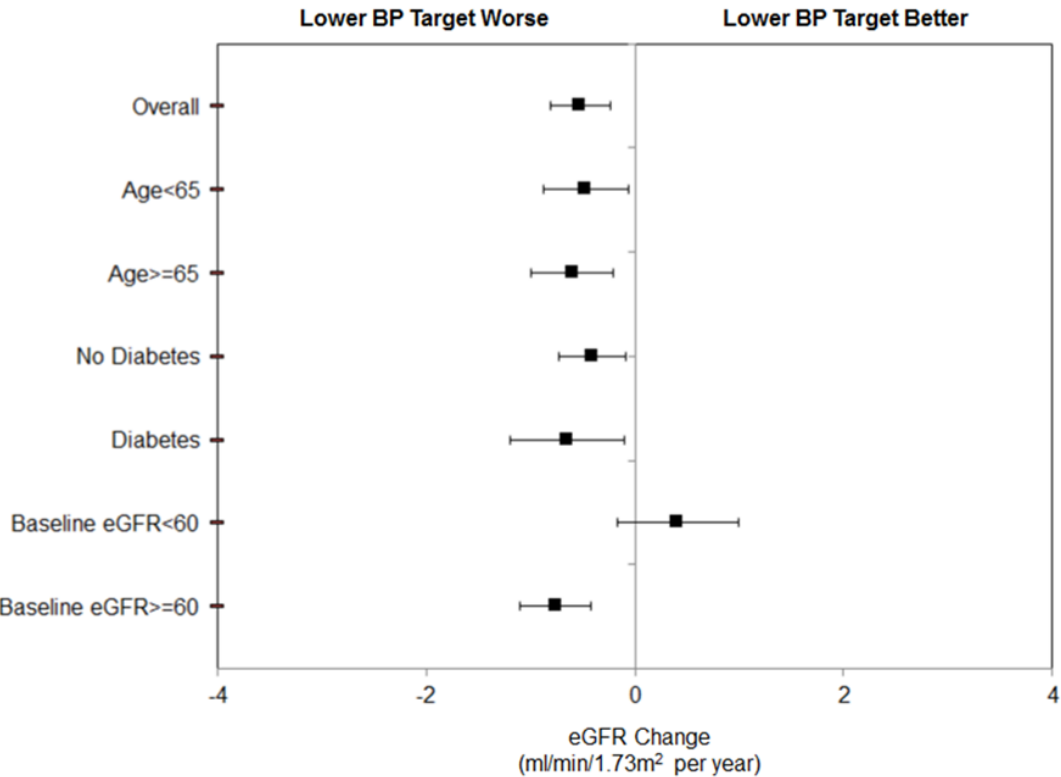

**Figure Legend:** Estimates represent eGFR in ml/min/1.73m<sup>2</sup> per year from the linear mixed model
